# Supplementary material for: Quantitative Assessment of First Nations Drinking Water Distribution Systems for Detection and Prevalence of Thermophilic Campylobacter Species
Source: MDPI journal article supplement (doi:10.3390/ijerph191710466), 2022-08-23
Supplement: s1 [file s1]

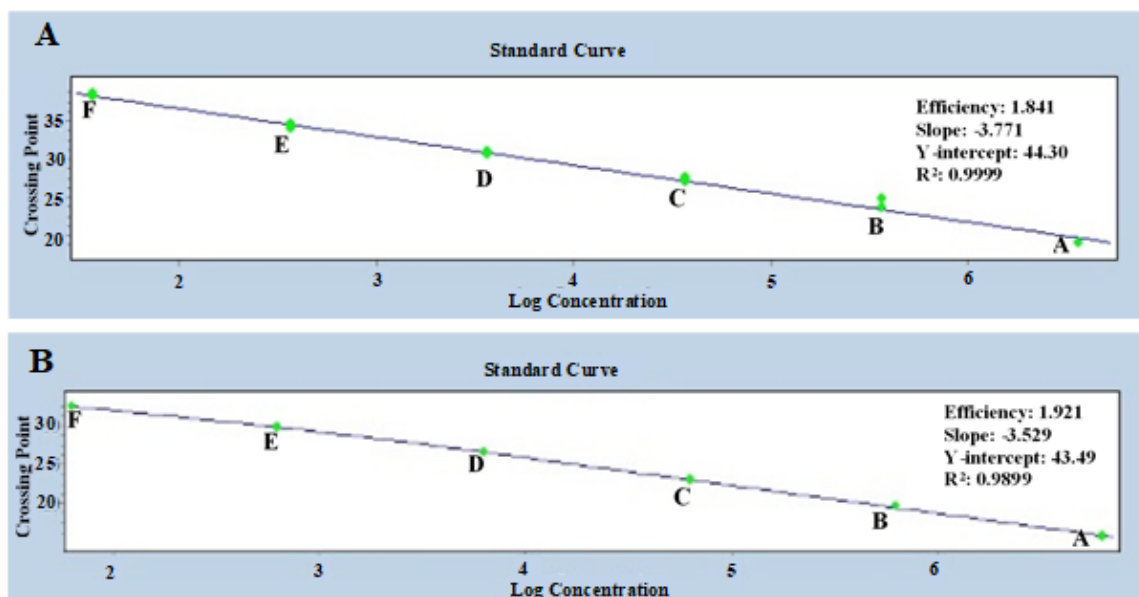

**Figure S1:** Development of standard curves for *C. coli* (Panel A) and *C. jejuni* (Panel B) generated based on amplification of DNA from increasing number of cells (A–F:  $10^7$ ,  $10^6$ ,  $10^5$ ,  $10^4$ ,  $10^3$ , and  $10^2$  cells  $\text{mL}^{-1}$ ) using species-specific TaqMan probe and SYBR Green-based quantitative real-time PCR assays.
